# Supplementary material
Source: PubMed Central journal article supplement (PMC4187703)
Supplement: JB.02071-14_zjb999093338so1.pdf [file JB.02071-14_zjb999093338so1.pdf]

## SUPPLEMENTAL INFORMATION

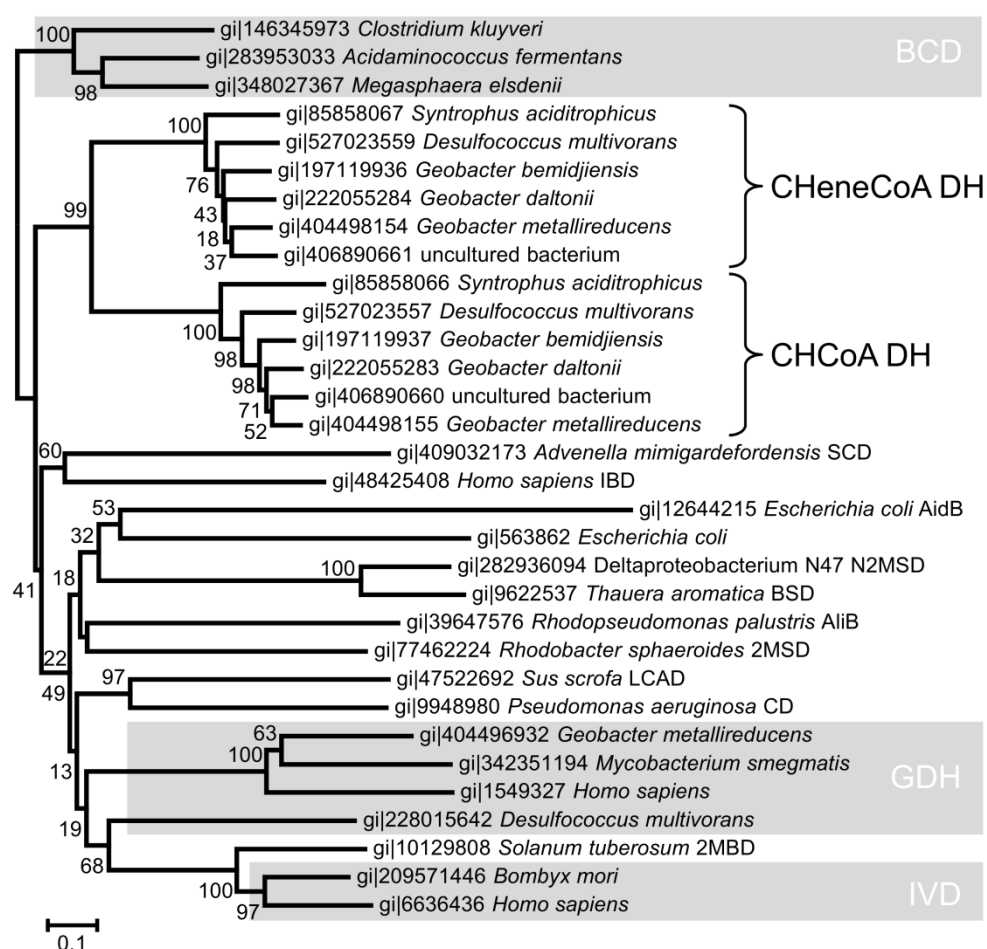

**Figure S1. Neighbour-joining phylogenetic tree of a representative selection of biochemically characterized acyl-CoA dehydrogenases including the two acyl-CoA dehydrogenases involved in the cyclohexanecarboxylic acid fermentation of axenically growing *Syntrophus aciditrophicus*.** The putative CHCoA and CHeneCoA dehydrogenases show sequence similarities of >60 % compared to the ChCoA and Ch1enCoA dehydrogenase, respectively. The subbranch of well described butyryl-CoA dehydrogenases was used as outgroup. Abbreviations: BCD, butyryl-CoA dehydrogenase; SCD, 3-Sulfinopropionyl-CoA desulfonase; IBDH, Isobutyryl-CoA dehydrogenase; IVD, Isovaleryl-CoA dehydrogenase; 2MBD, 2-Methylbutyryl-CoA dehydrogenase; GDH, Glutaryl-CoA dehydrogenase; CD, Citronellyl-CoA dehydrogenase; LCAD, Long chain acyl-CoA dehydrogenase; 2MSD, 2-Methylsuccinyl-CoA dehydrogenase; AliB, ChCoA dehydrogenase; BSD, Benzylsuccinyl-CoA dehydrogenase; N2MSD, Naphthyl-2-Methylsuccinyl-CoA dehydrogenase; CBD, Crotonobetainyl-CoA dehydrogenase; AidB, Catalytically inefficient acyl-CoA dehydrogenase homolog involved in DNA repair. Bootstrap values are given for 1000 repetitions are given.

**Table S1. List of primers used for cloning genes Champion pET101 directional Topo expression kit.**

| primer               | sequence (5' to 3')           | target gene      | annotation                               |
|----------------------|-------------------------------|------------------|------------------------------------------|
| <i>Gmet_3304_For</i> | CACCATGGAAAGCGTAAAAAATGCCAAG  | <i>Gmet_3304</i> | succinyl:benzoate coenzyme A transferase |
| <i>Gmet_3304_rev</i> | AATGCGGTTTCATCCTTCTGGC        |                  |                                          |
| <i>Gmet_3306_For</i> | CACCATGAAACATCTTACCGAAGAACAG  | <i>Gmet_3306</i> | short-chain acyl-CoA dehydrogenase       |
| <i>Gmet_3306_rev</i> | CGGGAACAACAGGGCCCTCC          |                  |                                          |
| <i>Gmet_3307_For</i> | CACCATGTTTAATACCAGCGAAGAAGTAC | <i>Gmet_3307</i> | short-chain acyl-CoA                     |

|                      |                       |  |               |
|----------------------|-----------------------|--|---------------|
| <i>Gmet_3306_rev</i> | AGCGGCCTCTTTCAGGATCTC |  | dehydrogenase |
|----------------------|-----------------------|--|---------------|

**Table S2. List of used primers during differential transcription analysis.**

| <b>primer</b> | <b>sequence (5' to 3')</b> | <b>target gene</b> | <b>annotation</b>                                                   |
|---------------|----------------------------|--------------------|---------------------------------------------------------------------|
| dpcr_fwd      | GGGAGACCTACGGTATTGA        | <i>Gmet_0899</i>   | Delta-1-pyrroline-5-carboxylate reductase                           |
| dpcr_rev      | GATGGAGATGACGAGCTTCC       |                    |                                                                     |
| mreb_fwd      | AAAGTCCACAACCGCAAGAC       | <i>Gmet_0918</i>   | rod shape-determining protein MreB                                  |
| mreb_rev      | GACTCGGCAGACTCCTTGAC       |                    |                                                                     |
| sdh_fwd       | GGTTGGAGTAGACGCTCTCG       | <i>Gmet_2397</i>   | succinate dehydrogenase/fumarate reductase, cytochrome b558 subunit |
| sdh_rev       | GCGGCGATATAGAGAACTGC       |                    |                                                                     |
| atpsb_fwd     | TGCCTCCCATCTACAACGCC       | <i>Gmet_3406</i>   | F0F1 ATP synthase subunit beta                                      |
| atpsb_rev     | TGGGCAACTTCGAGCACCAG       |                    |                                                                     |
| mbptp_fwd     | CCGATCCCTACATCATCGTC       | <i>Gmet_3239</i>   | membrane-bound proton-translocating pyrophosphatase                 |
| mbptp_rev     | CCCTTGATTTACGGAAGTGC       |                    |                                                                     |
| 3305_fwd      | CCACAACCTGATCGACTGTGA      | <i>Gmet_3305</i>   | enoyl-CoA hydratase/isomerase                                       |
| 3305_rev      | GTTGTAGAGCCCTTCCGCC        |                    |                                                                     |
| 3306_fwd      | CCGACCTCCTTGCCATGAAA       | <i>Gmet_3306</i>   | short-chain acyl-CoA dehydrogenase                                  |
| 3306_rev      | GAGCCGTTGGTGATGAAGCA       |                    |                                                                     |
| bamA_fwd      | CCACAATTTGATCGACCGTGAG     | <i>Gmet_2088</i>   | 6-oxocyclohex-1-ene-1-carbonyl-CoA hydratase                        |
| bamA_rev      | CTCTGCCACACTGCCGTC         |                    |                                                                     |
| bamB-1_fwd    | CCGGGCCTTCAACATCAGAA       | <i>Gmet_2087</i>   | benzoyl-CoA reductase                                               |
| bamB-1_rev    | CCTTCTCAAGCTCGGGGAAC       |                    |                                                                     |
| bamM_fwd      | CCGAGATGGTCACCGAGATC       | <i>Gmet_2075</i>   | glutaryl-CoA dehydrogenase                                          |
| bamM_rev      | CGGAGAGTAGTTCCCCTGGT       |                    |                                                                     |
| bamQ_fwd      | TCCGCCGTCTGACAATGAAG       | <i>Gmet_2151</i>   | 6-hydroxycyclohex-1-ene-1-carbonyl-CoA dehydrogenase                |
| bamQ_rev      | CGCCATCGTAATAGAAGCCCA      |                    |                                                                     |
